# Supplementary material for: A Label-Free Aptasensor for Turn-On Fluorescent Detection of Aflatoxin B1 Based on an Aggregation-Induced-Emission-Active Probe and Single-Walled Carbon Nanohorns
Source: MDPI journal article supplement (doi:10.3390/foods12234332), 2023-12-01
Supplement: s1 [file s1]

## Supporting information

# A label-free aptasensor for turn-on fluorescent detection of aflatoxin B1 based on an aggregation-induced-emission-active probe and single-walled carbon nanohorns

Huanhuan Yang <sup>1,2</sup>, Lei Lv <sup>3</sup>, Mengyu Niu <sup>3</sup>, Dongjie Zhang <sup>1,\*</sup> and Zhijun Guo <sup>3,\*</sup>

<sup>1</sup> College of Food Science, Heilongjiang Bayi Agricultural University, Daqing 163000, China;

[zhangdongjie@byau.edu.cn](mailto:zhangdongjie@byau.edu.cn) (D.Z.)

<sup>2</sup> College of Life Science, Changchun Normal University, Changchun 130032, China; [yanghuanhuan@ccsfu.edu.cn](mailto:yanghuanhuan@ccsfu.edu.cn) (H.Y.)

<sup>3</sup> College of Agriculture, Yanbian University, Yanji 133002, China; [lvlei@ybu.edu.cn](mailto:lvlei@ybu.edu.cn) (L.L.); [myniu@ybu.edu.cn](mailto:myniu@ybu.edu.cn) (M.N.)

\* Correspondence: [zhangdongjie@byau.edu.cn](mailto:zhangdongjie@byau.edu.cn) (D.Z.); [zjguo@ybu.edu.cn](mailto:zjguo@ybu.edu.cn) (Z.G.); Tel./Fax: +86-433-2435549 (Z.G.)

## Sample preparation for HPLC

A volume of 2 mL of methanol/water (80/20, v/v) extraction solution was utilized to ultrasonically extract 8 mL of soybean sauce for 20 min. After filtration through a filter paper, 2 mL of the filtrate were passed through an immunoaffinity column at the flow rate of approximately 1 drop per second. Wash the immunoaffinity column with 2 mL of water at a flow rate of 1-2 drops per second until 2-3 mL of air passed through the column. Then, the analytes were eluted into the vial with 1 mL of methanol at a flow rate of 1 drop per second. The eluates were evaporated to dryness under a stream of nitrogen at 45 °C. The residues were redissolved in 500 µL of methanol and filtered through 0.22 µm filters prior to HPLC analysis.

## HPLC-FLD conditions

HPLC analysis was performed using a C18 column (Agilent SB-C18, 150 mm×4.6 mm, 5  $\mu$ m) in a Agilent 1260 HPLC chromatographic system under isocratic conditions and column temperature was maintained at 30 °C. water/methanol/acetonitrile (42:40:18, v/v) were used as mobile phase. The sample (10  $\mu$ l) was injected at a flow rate of 1 ml/min. The FLD detection was obtained by means of a Agilent 1260 G1321C Fluorescence Detector ( $\lambda_{\text{ex}}$  =360 nm,  $\lambda_{\text{em}}$  = 450 nm). **Figure S1** is the HPLC chromatogram of soybean sauce, it indicated that the commercial soybean sauce is AFB1-free.

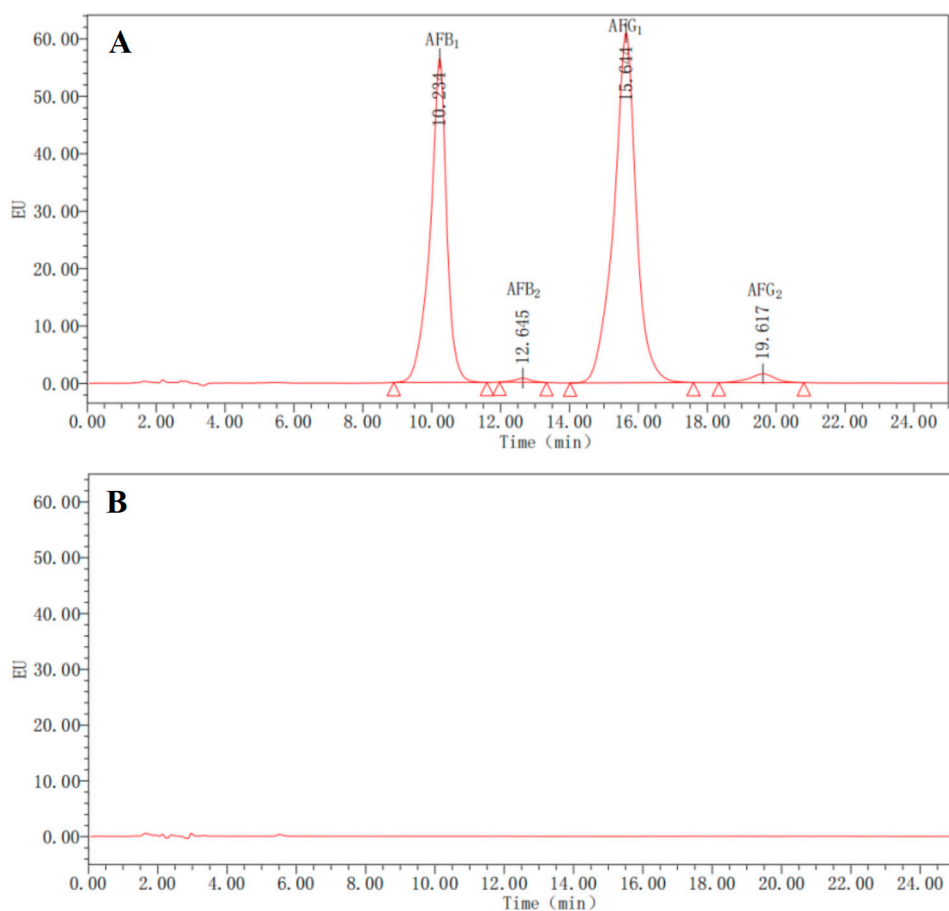

**Figure S1.** (A) Aflatoxin typical standard chromatogram with aflatoxin B1 at 50 ng/mL, B2 at 12.5 ng/mL, G1 at 50 ng/mL, and G2 at 12.5 ng/mL; (B) The HPLC chromatogram of commercial AFB1-free soybean sauce.

**Figure S2** is the calibration plot in the presence of various concentrations of AFB1 in 2% soybean sauce samples. After conducting a linear regression analysis, the formula  $Y = 33.4475X + 22.5945$  was derived, where the logarithm of the AFB1 concentration (X) and the fluorescence extent (Y) is represented respectively. In the concentration range from 5 to 500 ng/mL, a strong linear relationship between the parameters was discovered ( $R^2=0.9936$ ). The LOD in this experiment turned out to be 1.92 ng/mL.

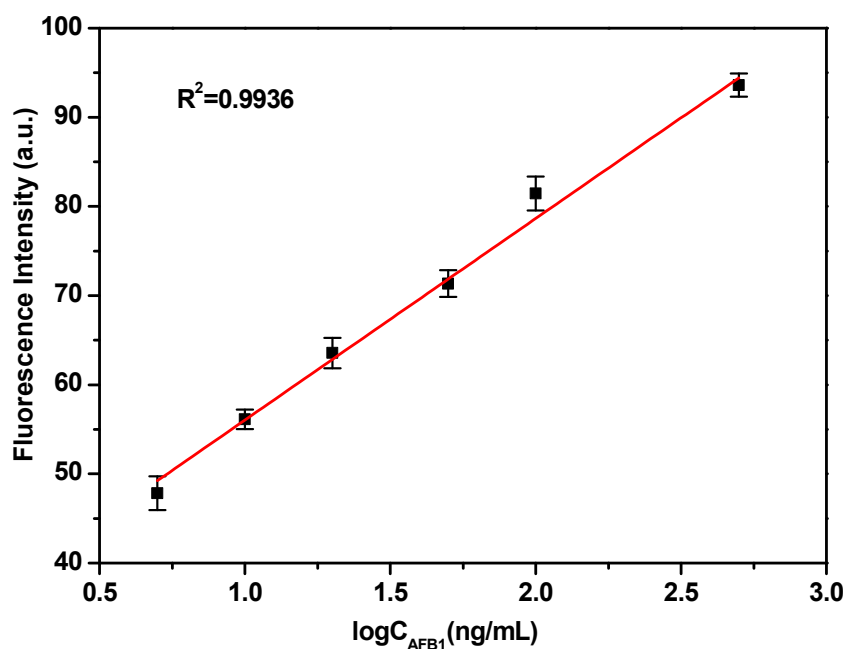

**Figure S2.** The calibration plot in the presence of various concentrations of AFB1 in soybean sauce.
